# Supplementary material for: Well-confined polyoxometalate-ionic liquid in silicic framework for environmentally friendly asymmetric di-hydroxylation of olefins
Source: Royal Society of Chemistry journal article supplement (doi:10.1039/c8ra10544h), 2019-01-01
Supplement: c8ra10544h1.pdf [file c8ra10544h1.pdf]

## Electronic Supporting Information

### The Well-confined Polyoxometalate-Ionic Liquid in Silicic Framework for the Environment-friendly Asymmetric Dihydroxylation of Olefins

Dong Liang, Yan Wang, Sifan Wang, Chengkun Song, Yonghe Shi, Qinghao Liu,

Hailin Zhu, Xia Li, Laishuan Liu, Na Zhu

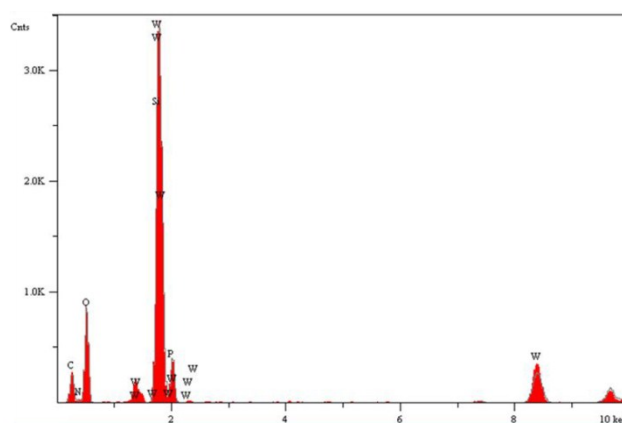

Fig.S1 EDX spectrum of POM-ILS (3/1)

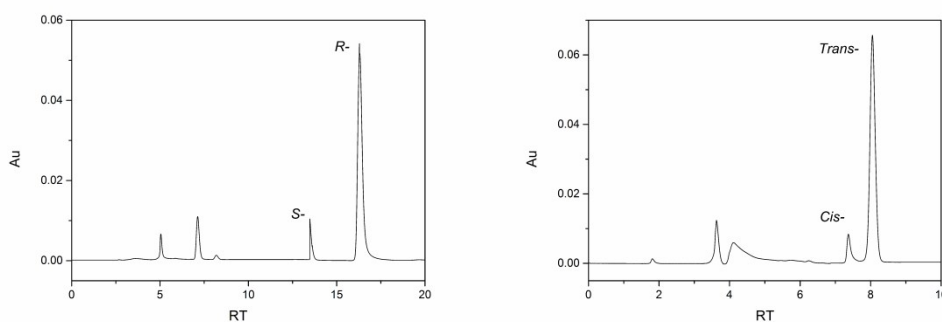

Fig. S2 HPLC analyses for enantiomeric purity of *R/S*-1-phenyl-1,2-ethanediols (a) and *Trans/Cis*-1,2-cyclohexanediols (b) on POM-ILS(1/3)

Table S1 The abundance survey of POM-IL/Silica catalysts

|    | Content of Tungsten            | SiO <sub>2</sub> -Supported ILs attached with POM                               | Ref.                                     |
|----|--------------------------------|---------------------------------------------------------------------------------|------------------------------------------|
| 1  | 0.105 mmol g <sup>-1</sup>     | Peroxotungstate Immobilized on Ionic Liquid-Modified Silica                     | J AM CHEM. SOC. 2005, 127, 530-531       |
| 2  | 0.091 mmol g <sup>-1</sup>     | Polyoxometalate Immobilized on Surface-Modified SiO <sub>2</sub>                | Chem A Eur J, 2006, 12, 4176-4184        |
| 3  | 0.173 mmol g <sup>-1</sup>     | Heteropoly acid on ionic liquid-modified SBA-15                                 | J Catal, 2008, 259, 232-239              |
| 4  | 0.142 mmol g <sup>-1</sup>     | Phosphotungstic Acid (PTA) Immobilized on Imidazole Functionalized Silica       | J Phys Chem, C 2009, 113, 21114–21122    |
| 5  | 0.22 mmol g <sup>-1</sup>      | Peroxotungstate immobilized on ionic liquid-modified silica                     | J Mol Catal A: Chem, 2008, 280, 142-147  |
| 6  | 0.607 mmol g <sup>-1</sup>     | Peroxotungstates immobilized on multilayer ionic liquid brushes-modified silica | J Mol Catal A: Chem, 2011, 341, 57-62    |
| 7  | Not supplied                   | Polyoxometalate-based ionic liquid supported silica                             | J Mol Catal A: Chem, 2015, 406, 23–30    |
| 8  | 0.06 mmol g <sup>-1</sup>      | Polyphosphomolybdates supported on ionic liquid-modified MCM-41                 | J Coord Chem, 2011, 64 (23), 4134-4144   |
| 9  | 0.05 mmol g <sup>-1</sup>      | Polyoxometalate immobilized on ionic liquid-modified silica                     | C. R. Chimie, 2012, 15, 975-979          |
| 10 | 0.20 mmol g <sup>-1</sup>      | Heteropoly acid on ionic liquid-modified SBA-15                                 | Micropor Mesopor Mater, 2012, 158, 77-87 |
| 11 | 0.82-0.95 mmol g <sup>-1</sup> | Polyoxometalate-IL immobilized in mesoporous silica                             | Micropor Mesopor Mater, 2013, 172, 67-76 |
| 12 | 0.2829 mmol g <sup>-1</sup>    | Peroxophosphotungstate on ionic liquid brush-SiO <sub>2</sub>                   | Appl Organometal Chem, 2014, 28, 760–763 |
| 13 | Not supplied                   | Mesoporous silica encapsulated polyoxometalate-based ionic liquids              | RSC Adv., 2015, 5, 76048                 |
